Fig. S1: Colony width in *Cristatella mucedo* is does not vary with length. Ordinary least squares regression of colony width against colony length ,  $P > 0.05$ .

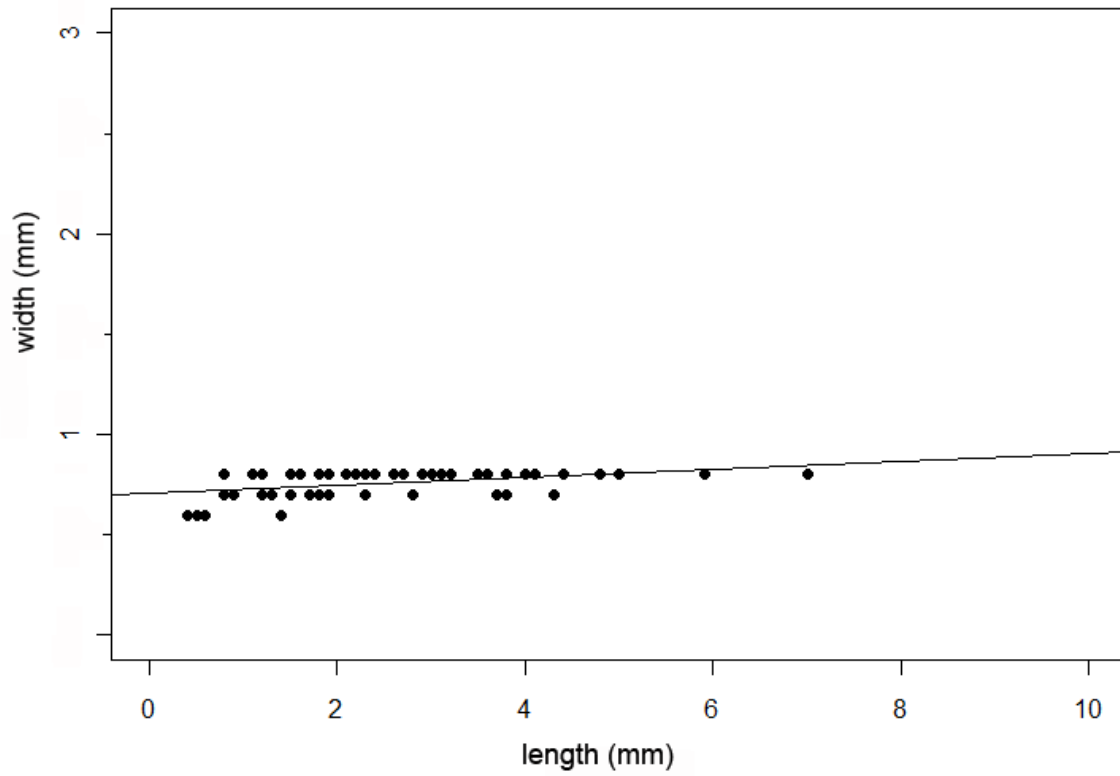

Source: https://cob.silverchair-cdn.com/cob/content_public/journal/jeb/217/5/10.1242_jeb.093484/4/jeb093484.pdf
